# Supplementary material for: Uniaxial alignment of triisopropylsilylethynyl pentacene via zone-casting technique
Source: Royal Society of Chemistry journal article supplement (doi:10.1039/c3cp51264a), 2013-01-01
Supplement: c3cp51264a.pdf [file c3cp51264a.pdf]

## Supporting Information

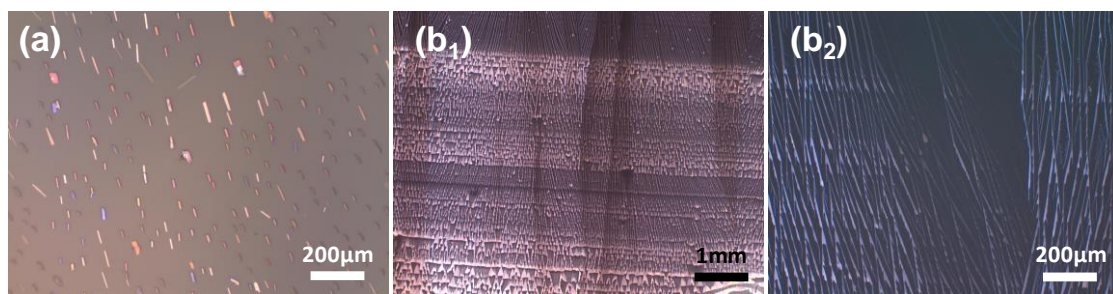

**Figure S1:** POM images of TIPS-pentacene crystals prepared by zone-casting TIPS-pentacene/toluene solution. The concentrations were (a) 2 mg/ml and (b) 5 mg/ml, respectively. (b1) and (b2) were POM images taken from different zones of the substrate. The casting speed was 50 μm/s. Discrete TIPS-pentacene crystals were observed when the concentrate was low (2 mg/ml). The continuous crystals with poor orientation were obtained at 5 mg/ml.

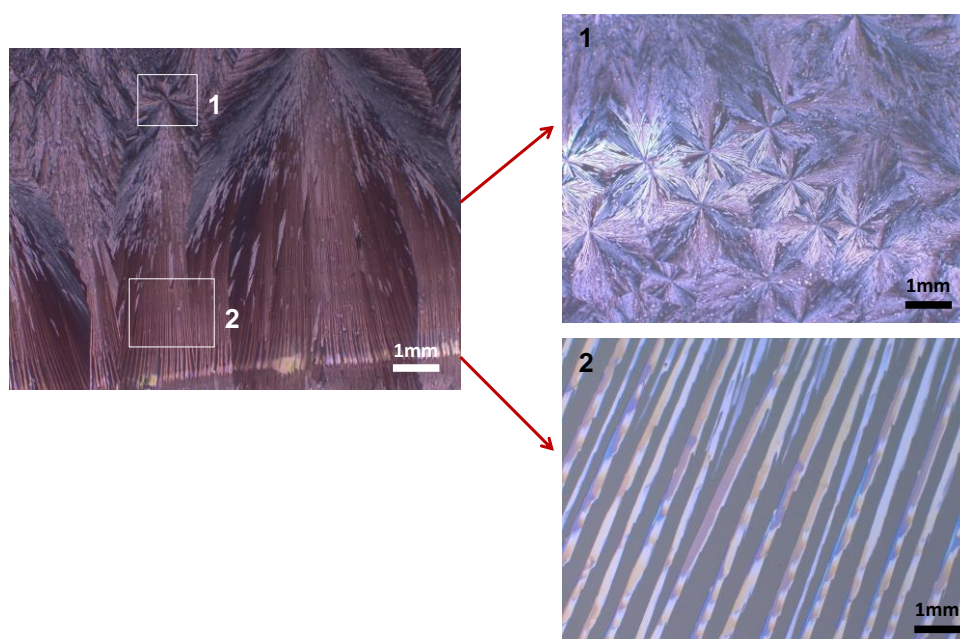

**Figure S2:** POM images showing the transition from TIPS-pentacene spherulites to oriented crystalline array. The images were taken from the edge of the substrate, where the zone-casting procedure started. The right images indicated typical POM images of the spherulites and aligned crystals.

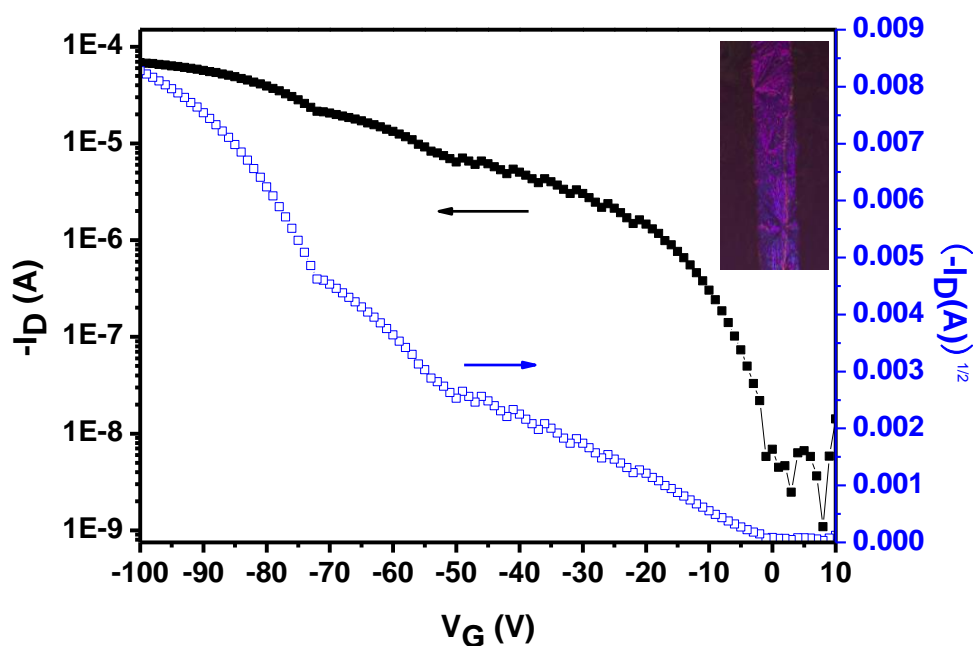

**Figure S3:** Typical characteristic transfer curve of OFET based on non-oriented TIPS-pentacene. The insert indicated the POM image of TIPS-pentacene crystals between the source and drain electrodes. The semiconductor layer was prepared by drop-casting TIPS-pentacene/ $\text{CHCl}_3$  solution (5mg/ml) on the substrate. The calculated field effect mobility was  $0.086 \text{ cm}^2 \text{ V}^{-1} \text{ s}^{-1}$ .
